# Supplementary material
Source: HighWire-hosted journal article supplement (https://www.cmajopen.ca/highwire/filestream/90590/field_highwire_adjunct_files/0/open-2023-0011-1-at.pdf)
Supplement: open-2023-0011-1-at.pdf [file open-2023-0011-1-at.pdf]

## APPENDIX 1: Supplemental material

### Recruitment Poster

# Residents Will Experience Patient Death During their Training...

We want to hear about ***your*** experiences with patient death.

We are interested in speaking with **resident physicians at McMaster University** who have experienced the **death of a patient** during their CTU rotation in Hamilton to learn more about your experiences, preparedness, and coping strategies.

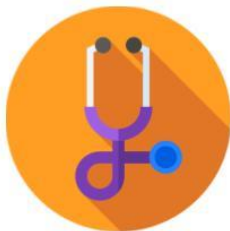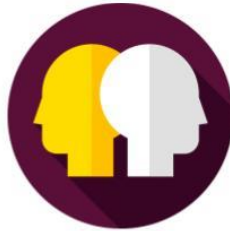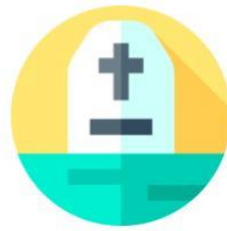

*You will be asked to complete one 15 – 30 minute telephone interview. Interviews will be audio recorded. Participation in the study is **voluntary and will not have any impact on your status or academic performance as a resident trainee.** You will receive a **\$20 gift card** of your choosing for participating!*

Recruitment to occur until **June 30 2021**.

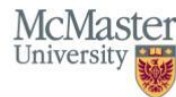

*Interested in participating?*

**CTUresidentexperience@gmail.com**

***This study has been reviewed by the Hamilton Integrated Research Ethics Board under Project #5140***

Icon made by Freepik from [www.flaticon.com](http://www.flaticon.com) Recruitment Poster version 4.0, November 19, 2020

## Residents Will Experience Patient Death During their Training...

We want to hear about **your** experiences.

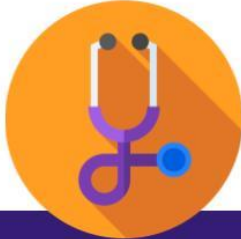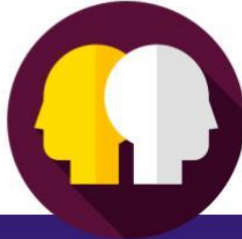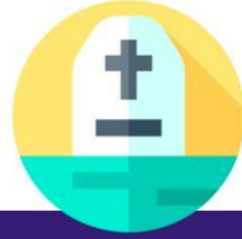

*This study has been reviewed by the Hamilton Integrated Research Ethics Board  
under Project #5140*

CTUresidentexperience@gmail.com

Icon made by Freepik from [www.flaticon.com](http://www.flaticon.com). Recruitment poster version 4.0 - November 19, 2020

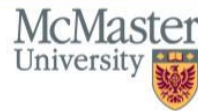

---

**For social media**

## Semi-Structured Interview Guide

### Demographics

1. What year of residency are you in?
2. What residency program are you in?
3. How old are you?
4. When during your medical training did you have your first experience with a patient's death?
5. Did you have a personal or professional experience with death prior to starting medical school?

### Interview Questions

1. Please describe your first experience with a patient's death during medical training.
  - a. How involved were you with the care of this patient?
  - b. How much time did you spend caring for the patient?
  - c. What were the circumstances surrounding the death? (ex. planned, expected, unexpected, medical error)
  - d. What was your role before and after the patient's death?
  - e. Did you speak with the family of the patient?
  - f. Were you present at the time of death? Were you involved in pronouncing the death?
  - g. Was there a specific/formal conversation or discussion about this patient's death?
  - h. Who was involved in this conversation? What did it entail? How was it useful?
  - i. What would you have changed about it?
  - j. Did you talk about this experience with someone else outside from work? Who? How was it useful?
2. How did this experience with patient death impact you?
  - a. For example, did it impact your learning, ability to provide patient care, mental health, work?
  - b. Did this experience affect any of your personal relationships?
3. Did you feel like the training you received prepared you for this experience?
4. What kind of things would have made this experience more positive?
5. Did you use any specific strategies or resources to cope with the death of the patient?
  - a. Which resources were you aware of within or outside of PGME at McMaster?
  - b. Were you concerned about any of the strategies you utilized?
  - c. Were there any other activities that you found helpful when dealing with a patient's death? – e.g. some people focus on hobbies, cooking, exercise, etc.
6. Can you think of another experience with a patient's death that stands out? Was this experience affected by the first one?
7. Did the policy changes with COVID-19 (protected code blues with minimal junior learners in room, no visitor's policy) impact your experiences with patient death?
8. Any other comments?
